# Supplementary material
Source: MDPI journal article supplement (https://www.mdpi.com/2673-9321/4/2/12)
Supplement: s1 [file s1]

### **Supplementary Information-1**

**Table S1.** The differential pore properties  $D_i$  (diameter, nm) and  $N_i$  (pore density, pores/g) of the three (3) porous spinels  $\text{CoAl}_2\text{O}_4$  T= 500, 700 and 900°C discussed in this work are from refs [21–25,32]. The partial pressure  $0 < (P/P_0) = P_i < 1$  where the  $D_i$  and  $N_i$  values were determined during nitrogen porosimetry is also shown.

| Sample<br>(P/P <sub>0</sub> )<br>= P <sub>i</sub> | CoAl <sub>2</sub> O <sub>4</sub> T= 500 |                   | CoAl <sub>2</sub> O <sub>4</sub> T= 700 |                   | CoAl <sub>2</sub> O <sub>4</sub> T= 900 |                   |
|---------------------------------------------------|-----------------------------------------|-------------------|-----------------------------------------|-------------------|-----------------------------------------|-------------------|
|                                                   | D <sub>i</sub>                          | N <sub>i</sub>    | D <sub>i</sub>                          | N <sub>i</sub>    | D <sub>i</sub>                          | N <sub>i</sub>    |
| 0.98                                              | 309.91                                  | 9067759646        | 253.01                                  | 17078904103       | 252.87                                  | 49270843805       |
| 0.95                                              | 64.32                                   | 264539178163      | 61.01                                   | 398208017644      | 52.58                                   | 3558688705709     |
| 0.93                                              | 35.92                                   | 3240634117835     | 34.50                                   | 4737835742965     | 32.13                                   | 55880463537476    |
| 0.90                                              | 24.56                                   | 13496463981022    | 23.61                                   | 23407228784966    | 23.16                                   | 115284255696360   |
| 0.87                                              | 18.48                                   | 36924106931047    | 18.75                                   | 105176811313147   | 18.04                                   | 220932699966522   |
| 0.85                                              | 15.21                                   | 107154397816546   | 15.20                                   | 398841186909054   | 14.96                                   | 321454862855085   |
| 0.83                                              | 12.97                                   | 271262649926444   | 12.65                                   | 931772738815137   | 12.72                                   | 438298515784645   |
| 0.80                                              | 11.10                                   | 579015247002377   | 11.02                                   | 1397912537589040  | 11.20                                   | 447146669162489   |
| 0.78                                              | 9.86                                    | 919496329637454   | 9.81                                    | 1620391662815550  | 9.96                                    | 531851024309287   |
| 0.75                                              | 8.88                                    | 1577066476158460  | 8.76                                    | 1820790588951420  | 8.87                                    | 517892951107001   |
| 0.72                                              | 7.93                                    | 2214929972152800  | 7.91                                    | 1403459872921180  | 7.95                                    | 503048664074821   |
| 0.70                                              | 7.23                                    | 2566492503130900  | 7.30                                    | 1423016710372750  | 7.32                                    | 455868936687398   |
| 0.68                                              | 6.70                                    | 2817993584168780  | 6.74                                    | 1491420128094410  | 6.77                                    | 492629029232393   |
| 0.65                                              | 6.21                                    | 3820850102331120  | 6.18                                    | 1703805437846680  | 6.28                                    | 505673273099893   |
| 0.62                                              | 5.75                                    | 3552057602758900  | 5.77                                    | 1451743867000400  | 5.84                                    | 533212104726982   |
| 0.61                                              | 5.39                                    | 3866784775517090  | 5.41                                    | 1542446111474940  | 5.46                                    | 582746937690193   |
| 0.57                                              | 5.05                                    | 4166582639579400  | 5.07                                    | 1558045010896630  | 5.12                                    | 585396336196931   |
| 0.55                                              | 4.70                                    | 4821808963982410  | 4.77                                    | 1637306552978100  | 4.81                                    | 672001124831790   |
| 0.53                                              | 4.45                                    | 4114148845952150  | 4.50                                    | 1705532501656570  | 4.53                                    | 635594309064240   |
| 0.50                                              | 4.21                                    | 4205522879206860  | 4.25                                    | 1769008827172410  | 4.27                                    | 661743981311969   |
| 0.48                                              | 3.98                                    | 4839383060820790  | 4.02                                    | 1853915775503570  | 4.04                                    | 661028219427376   |
| 0.45                                              | 3.75                                    | 6409143566447780  | 3.79                                    | 2535478895656410  | 3.81                                    | 1103544879611580  |
| 0.40                                              | 3.46                                    | 8283807535148010  | 3.50                                    | 3562706121587550  | 3.52                                    | 1561852438566660  |
| 0.35                                              | 3.13                                    | 9728592218868120  | 3.16                                    | 4598116811719670  | 3.18                                    | 2139094642489160  |
| 0.30                                              | 2.84                                    | 11035702899640200 | 2.86                                    | 5040341936999040  | 2.88                                    | 2188567773607070  |
| 0.25                                              | 2.57                                    | 13194106946880800 | 2.59                                    | 5809115346957050  | 2.60                                    | 2776962403492060  |
| 0.20                                              | 2.33                                    | 16680920017920600 | 2.34                                    | 7023118560445030  | 2.35                                    | 3648211432744950  |
| 0.15                                              | 2.09                                    | 19807059217500600 | 2.10                                    | 9979068412838220  | 2.11                                    | 6182583635018640  |
| 0.10                                              | 1.85                                    | 19567259291052600 | 1.86                                    | 15648402201583900 | 1.87                                    | 12006045917612600 |

## Supplementary Information-2

**Table S2.** Pore properties  $D_i$  (diameter, nm) and  $N_i$  (pore density, pores/g) of eight (8) porous volcanic rocks or mimics plus one (1) sample of porous soil(last double column) discussed in the present work. The original publications are cited.

| Sample code name Short description | ET 8, Lab made volcanic rock mimic [36] |       | ET 9, Lab made volcanic rock mimic [36] |         | Scoria, Magmatic rock from Etna mountain, Italy [37-39] |       | Pumice, Magmatic rock from Volcano Isola, Italy [37-39] |         | T28-G4-24, Magmatic rock from Tarawera Volcano, New Zealand [40] |          | T43-07-67, Magmatic rock from Tarawera Volcano, New Zealand [40] |           | T47-12-56, Magmatic rock from Tarawera Volcano, New Zealand [40] |          | T47-23-35, Magmatic rock from Tarawera Volcano, New Zealand [40] |          | Soil sample from Nannin, Guangxi,China [35] |             |
|------------------------------------|-----------------------------------------|-------|-----------------------------------------|---------|---------------------------------------------------------|-------|---------------------------------------------------------|---------|------------------------------------------------------------------|----------|------------------------------------------------------------------|-----------|------------------------------------------------------------------|----------|------------------------------------------------------------------|----------|---------------------------------------------|-------------|
| Properties                         | D                                       | N     | D                                       | N       | D                                                       | N     | D                                                       | N       | D                                                                | N        | D                                                                | N         | D                                                                | N        | D                                                                | N        | D                                           | N           |
|                                    | 50000                                   | 44356 | 10000                                   | 2421754 | 1600000                                                 | 0.061 | 700000                                                  | 0.21654 | 56683                                                            | 565.7    | 55716                                                            | 438.4     | 100600                                                           | 652.5    | 71044                                                            | 608.8    | 274                                         | 15939694740 |
|                                    | 100000                                  | 1636  | 30000                                   | 133251  | 1900000                                                 | 0.067 | 1130000                                                 | 0.04979 | 71884                                                            | 282.81   | 71297                                                            | 285.94    | 138570                                                           | 410.8    | 88871                                                            | 406.7    | 316                                         | 8974287945  |
|                                    | 150000                                  | 602   | 40000                                   | 40135   | 1800000                                                 | 0.041 | 1470000                                                 | 0.00985 | 89045                                                            | 196.14   | 88994                                                            | 184.6     | 186192                                                           | 237.12   | 112639                                                           | 258.81   | 392                                         | 3958858690  |
|                                    | 200000                                  | 245   | 50000                                   | 29732   | 2100000                                                 | 0.045 | 1900000                                                 | 0.00258 | 112039                                                           | 112.2    | 112011                                                           | 121.63    | 252947                                                           | 142.57   | 140919                                                           | 140.13   | 422                                         | 2974883754  |
|                                    | 250000                                  | 221   | 60000                                   | 19931   | 2100000                                                 | 0.037 | 2330000                                                 | 0.00338 | 141351                                                           | 76.82    | 140679                                                           | 68.79     | 342713                                                           | 90.21    | 179808                                                           | 82.27    | 487                                         | 1742047530  |
|                                    | 300000                                  | 40    | 70000                                   | 8955    | 2300000                                                 | 0.030 | 2500000                                                 | 0.00075 | 178789                                                           | 45.97    | 179271                                                           | 41.57     | 460479                                                           | 53.96    | 226428                                                           | 44.54    | 523                                         | 1302326867  |
|                                    | 350000                                  | 49    | 80000                                   | 10938   | 2000000                                                 | 0.025 | 2900000                                                 | 0.00044 | 227332                                                           | 29.516   | 224698                                                           | 25.765    | 630798                                                           | 23.901   | 283302                                                           | 18.927   | 650                                         | 624122731   |
|                                    | 400000                                  | 12    | 90000                                   | 9897    | 1900000                                                 | 0.022 | 3330000                                                 | 0.00031 | 284557                                                           | 26.464   | 281061                                                           | 12.133    | 856998                                                           | 10.589   | 359170                                                           | 7.418    | 750                                         | 370953950   |
|                                    | 450000                                  | 33    | 95000                                   | 6003    | 2200000                                                 | 0.018 | 3730000                                                 | 0.00030 | 358996                                                           | 13.749   | 355943                                                           | 7.482     | 1181708                                                          | 6.038    | 446427                                                           | 3.2557   | 866                                         | 229488010   |
|                                    | 500000                                  | 16    | 100000                                  | 1808    | 2600000                                                 | 0.017 | 4300000                                                 | 0.00034 | 445862                                                           | 6.162    | 444294                                                           | 3.8419    | 1586098                                                          | 2.8335   | 569705                                                           | 1.3834   | 986                                         | 147706634   |
|                                    | 650000                                  | 4     | 150000                                  | 518     | 2400000                                                 | 0.012 | 3900000                                                 | 0.00006 | 566905                                                           | 2.9832   | 558020                                                           | 1.9428    | 2166806                                                          | 1.2296   | 717447                                                           | 0.6798   | 1155                                        | 87058263    |
|                                    | 700000                                  | 7     | 200000                                  | 270     | 2700000                                                 | 0.014 | 4600000                                                 | 0.00002 | 713346                                                           | 1.3032   | 709643                                                           | 0.7975    | 2951889                                                          | 0.6092   | 891846                                                           | 0.24183  | 1334                                        | 53365428    |
|                                    | 900000                                  | 8     | 250000                                  | 99      | 2800000                                                 | 0.010 | 4900000                                                 | 0.00014 | 892915                                                           | 0.4547   | 891312                                                           | 0.30173   | 4006083                                                          | 0.30027  | 1130603                                                          | 0.10614  | 1655                                        | 26303286    |
|                                    |                                         |       | 300000                                  | 90      | 3000000                                                 | 0.009 | 5400000                                                 | 0.00014 | 1129406                                                          | 0.17137  | 1124087                                                          | 0.14875   | 5440640                                                          | 0.11771  | 1424098                                                          | 0.036554 | 2054                                        | 12899415    |
|                                    |                                         |       | 350000                                  | 33      | 3200000                                                 | 0.011 | 6100000                                                 | 0.00015 | 1410003                                                          | 0.09494  | 1397398                                                          | 0.05744   | 7338039                                                          | 0.07565  | 1782584                                                          | 0.006387 | 2207                                        | 10051711    |
|                                    |                                         |       | 400000                                  | 22      | 3300000                                                 | 0.010 | 5700000                                                 | 0.00006 | 1788216                                                          | 0.032079 | 1765997                                                          | 0.02637   | 9755061                                                          | 0.030707 | 2260893                                                          | 0.001063 | 2550                                        | 6292019     |
|                                    |                                         |       | 500000                                  | 11      | 3100000                                                 | 0.006 | 6500000                                                 | 0.00005 | 2261778                                                          | 0.01084  | 2241197                                                          | 0.014614  | 10027900                                                         | 0.008858 | 2846099                                                          | 0.001172 | 3924                                        | 1480062     |
|                                    |                                         |       | 550000                                  | 8       | 3300000                                                 | 0.004 | 6900000                                                 | 0.00004 | 2838573                                                          | 0.003782 | 2795181                                                          | 0.0027584 | 13737889                                                         | 0.005219 | 3582696                                                          | 0.001401 | 4870                                        | 774248      |
|                                    |                                         |       | 700000                                  | 3       | 3600000                                                 | 0.005 | 7300000                                                 | 0.00006 | 4482600                                                          | 0.001014 | 3542175                                                          | 0.003968  | 18077151                                                         | 0.002723 | 4479917                                                          | 0.002133 | 5623                                        | 461073      |
|                                    |                                         |       | 900000                                  | 3       | 3700000                                                 | 0.006 | 7600000                                                 | 0.00006 | 5640401                                                          | 0.00158  | 4429962                                                          | 0.0020294 | 18477789                                                         | 0.001193 |                                                                  |          | 8660                                        | 103269      |
|                                    |                                         |       |                                         |         | 3700000                                                 | 0.007 | 7900000                                                 | 0.00010 |                                                                  |          |                                                                  |           | 25444270                                                         | 0.001404 |                                                                  |          | 10000                                       | 67069       |
|                                    |                                         |       |                                         |         | 3500000                                                 | 0.004 | 8900000                                                 | 0.00005 |                                                                  |          |                                                                  |           | 34127148                                                         | 0.00214  |                                                                  |          |                                             |             |
|                                    |                                         |       |                                         |         | 4200000                                                 | 0.004 | 9300000                                                 | 0.00002 |                                                                  |          |                                                                  |           |                                                                  |          |                                                                  |          |                                             |             |
|                                    |                                         |       |                                         |         | 4700000                                                 | 0.004 | 9700000                                                 | 0.00002 |                                                                  |          |                                                                  |           |                                                                  |          |                                                                  |          |                                             |             |
|                                    |                                         |       |                                         |         | 4500000                                                 | 0.003 | 10100000                                                | 0.00002 |                                                                  |          |                                                                  |           |                                                                  |          |                                                                  |          |                                             |             |
|                                    |                                         |       |                                         |         | 4800000                                                 | 0.002 | 11100000                                                | 0.00002 |                                                                  |          |                                                                  |           |                                                                  |          |                                                                  |          |                                             |             |
|                                    |                                         |       |                                         |         | 4800000                                                 | 0.002 | 11600000                                                | 0.00002 |                                                                  |          |                                                                  |           |                                                                  |          |                                                                  |          |                                             |             |
|                                    |                                         |       |                                         |         | 5200000                                                 | 0.002 | 12300000                                                | 0.00002 |                                                                  |          |                                                                  |           |                                                                  |          |                                                                  |          |                                             |             |
|                                    |                                         |       |                                         |         | 6100000                                                 | 0.002 | 13100000                                                | 0.00002 |                                                                  |          |                                                                  |           |                                                                  |          |                                                                  |          |                                             |             |
|                                    |                                         |       |                                         |         | 6300000                                                 | 0.002 | 13700000                                                | 0.00002 |                                                                  |          |                                                                  |           |                                                                  |          |                                                                  |          |                                             |             |
|                                    |                                         |       |                                         |         | 6800000                                                 | 0.002 | 15700000                                                | 0.00002 |                                                                  |          |                                                                  |           |                                                                  |          |                                                                  |          |                                             |             |
|                                    |                                         |       |                                         |         | 7300000                                                 | 0.002 | 21200000                                                | 0.00003 |                                                                  |          |                                                                  |           |                                                                  |          |                                                                  |          |                                             |             |
|                                    |                                         |       |                                         |         | 7400000                                                 | 0.002 | 24500000                                                | 0.00001 |                                                                  |          |                                                                  |           |                                                                  |          |                                                                  |          |                                             |             |
|                                    |                                         |       |                                         |         | 9400000                                                 | 0.002 | 28100000                                                | 0.00001 |                                                                  |          |                                                                  |           |                                                                  |          |                                                                  |          |                                             |             |
|                                    |                                         |       |                                         |         | 9500000                                                 | 0.002 |                                                         |         |                                                                  |          |                                                                  |           |                                                                  |          |                                                                  |          |                                             |             |
|                                    |                                         |       |                                         |         | 10000000                                                | 0.002 |                                                         |         |                                                                  |          |                                                                  |           |                                                                  |          |                                                                  |          |                                             |             |
|                                    |                                         |       |                                         |         | 13400000                                                | 0.002 |                                                         |         |                                                                  |          |                                                                  |           |                                                                  |          |                                                                  |          |                                             |             |
|                                    |                                         |       |                                         |         | 13600000                                                | 0.002 |                                                         |         |                                                                  |          |                                                                  |           |                                                                  |          |                                                                  |          |                                             |             |
|                                    |                                         |       |                                         |         | 16200000                                                | 0.002 |                                                         |         |                                                                  |          |                                                                  |           |                                                                  |          |                                                                  |          |                                             |             |

### Supplementary Information -3.

**Table S3.** The seventeen (17) different categories of porous solids that are depicted in Figure 3 by 17 different colored points as follows: 1-(■); 2-(●); 3-(▲); 4-(▼); 5-(◆); 6-(◀); 7-(▶); 8-(⬢); 9-(★); 10-(◆); 11-(●); 12-(+); 13-(×); 14-(✱); 15-(-); 16-(⌀); 17-(■). The total number of samples is 206. Original sources of data and details about their pore properties are in ref.[32].

| No of group and Symbol in Figure 3 | Number and short description of samples in the group                                                                                             |
|------------------------------------|--------------------------------------------------------------------------------------------------------------------------------------------------|
| 1-(■)                              | Twelve (12) porous materials, of which six (6) mesoporous silicas $\text{SiO}_2$ and six (6) porous spinels $\text{CoAl}_2\text{O}_4$            |
| 2-(●)                              | Sixteen (16) Porous Alumino-Phosphoro-Vanadate materials $\text{Al}_{100}\text{P}_x\text{V}_y$ ( $x, y = 0, 5, 10, 20$ )                         |
| 3-(▲)                              | Eight (8) samples of Porous Montmorillonite Pillared with $\text{LaNiO}_x$ perovskite species                                                    |
| 4-(▼)                              | Fifteen (15) nanostructured mesoporous solids of MCM-48, SBA-15 and SBA-16 type                                                                  |
| 5-(◆)                              | Five (5) MCM-type mesoporous solids with Al and Ti heteroatoms                                                                                   |
| 6-(◀)                              | Fifteen (15) mixed oxides $(\text{ZrO}_2)_{1-x}(\text{CeO}_2)_x$ -T °C                                                                           |
| 7-(▶)                              | Eight porous materials, MSU, MCM-41, Zeolite beta and 5 mechanical mixtures (x%) MCM- 41+ (1-x%) Zeolite beta                                    |
| 8-(⬢)                              | Ten (10) porous materials of which Six (6) mesoporous MCM's and Four (4) silicas with modified surface.                                          |
| 9-(★)                              | Six (6) organized mesoporous silicas of MCM type.                                                                                                |
| 10-(◆)                             | Nine (9) organized mesoporous silicates (OMSi) containing cobalt and cerium oxidic species.                                                      |
| 11-(●)                             | Eighteen (18) organized mesoporous silico - nickelates (OMSiNi) and silico - lanthano-nickelates (OMSiLaNi).                                     |
| 12-(+)                             | Sixteen (16) Porous Alumino-Phosphoro - Cerate materials $\text{Al}_{100}\text{P}_x\text{Ce}_y$ ( $x, y = 0, 5, 10, 20$ ).                       |
| 13-(×)                             | Twenty two (22) Mesoporous Alumino- Phospho - Metalate Matrerials $\text{Al}_{100}\text{P}_x\text{M}_{20}$ ( $x = 0, 4.5, 9, 18, 36, 72, 144$ ). |
| 14-(✱)                             | Ten (10) samples of $\text{SiO}_2(\text{OA})_n$ silicas                                                                                          |
| 15-(-)                             | Five (5) mesoporous MCM-41 materials with different ratios of Si/Al and Si/Ti.                                                                   |
| 16-(⌀)                             | Twenty four (24) oxidic porous materials $\text{MnO}_x/\text{T/pH}/^\circ\text{C}$ obtained via hydrolysis of multinuclear Mn - complexes        |
| 17-(■)                             | Nine (9) Alumino-Phosphoro-Ferrates $\text{Al}_{100}\text{P}_x\text{Fe}_y$ ( $x = 0, 15, 60; y = 0, 5, 20$ ).                                    |
|                                    | <b>Total number of samples 206</b>                                                                                                               |
